# Supplementary material for: PD-L1 and PD-L2 Expression in Cervical Cancer: Regulation and Biomarker Potential
Source: PubMed Central journal article supplement (PMC7793653; doi:10.3389/fimmu.2020.596825), 2020-12-17
Supplement: DataSheet_1.pdf [file DataSheet_1.pdf]

| HUGO                 | R     | pval     |
|----------------------|-------|----------|
| ADAMTS12             | 0.325 | 6.39e-03 |
| FRK                  |       |          |
| <i>kinase,sign</i>   | 0.432 | 3.22e-05 |
| <i>transd</i>        |       |          |
| MFN1                 | 0.313 | 9.85e-03 |
| <i>membrane</i>      |       |          |
| IPO9                 | 0.430 | 3.49e-05 |
| ADAM23               |       |          |
| <i>development,m</i> | 0.313 | 9.82e-03 |
| <i>embrane</i>       |       |          |
| CAMSAP2              | 0.425 | 4.79e-05 |
| HECTD1               | 0.313 | 9.77e-03 |
| PUM1                 | 0.410 | 1.11e-04 |
| PLEKHG6              | 0.410 | 1.14e-04 |
| <i>sign transd</i>   |       |          |
| SUN1                 | 0.407 | 1.36e-04 |
| SH3PXD2B             | 0.400 | 2.01e-04 |
| MAP3K4               |       |          |
| <i>kinase,sign</i>   | 0.399 | 2.08e-04 |
| <i>transd</i>        |       |          |
| PLEKHA1              | 0.387 | 3.96e-04 |
| <i>membrane</i>      |       |          |
| LRP6                 |       |          |
| <i>development,m</i> | 0.314 | 9.59e-03 |
| <i>embrane</i>       |       |          |
| <i>,sign transd</i>  |       |          |
| ZNF704               | 0.384 | 4.63e-04 |
| SHISA2               | 0.383 | 4.83e-04 |
| FAM172A              | 0.314 | 9.40e-03 |
| PRICKLE1             | 0.383 | 4.85e-04 |
| <i>membrane</i>      |       |          |
| UBTD2                | 0.378 | 6.20e-04 |
| SHANK1               | 0.378 | 6.39e-04 |
| PRND                 | 0.376 | 6.84e-04 |
| <i>membrane</i>      |       |          |
| LRP4                 | 0.371 | 8.92e-04 |
| <i>membrane</i>      |       |          |
| PCLO                 | 0.367 | 1.09e-03 |
| <i>membrane</i>      |       |          |
| CNKSR3               |       |          |
| <i>membrane,sig</i>  | 0.315 | 9.20e-03 |
| <i>n transd</i>      |       |          |
| LRRC17               | 0.315 | 9.20e-03 |
| TULP3                |       |          |
| <i>membrane,sig</i>  | 0.315 | 9.20e-03 |
| <i>n transd</i>      |       |          |

|                        |       |          |
|------------------------|-------|----------|
| B3GNT5                 |       |          |
| <i>development,m</i>   | 0.315 | 9.17e-03 |
| <i>embrane</i>         |       |          |
| VGLL4                  | 0.365 | 1.16e-03 |
| TOM1L1                 |       |          |
| <i>membrane</i>        | 0.365 | 1.18e-03 |
| TANC1                  | 0.316 | 9.05e-03 |
| ZC3HAV1L               | 0.316 | 9.05e-03 |
| PPFIBP1                |       |          |
| <i>membrane</i>        | 0.361 | 1.40e-03 |
| GALNT13                |       |          |
| <i>membrane</i>        | 0.360 | 1.44e-03 |
| SERTAD4                | 0.360 | 1.47e-03 |
| ACPP                   | 0.360 | 1.48e-03 |
| PSD3 <i>sign</i>       |       |          |
| <i>transd</i>          | 0.359 | 1.55e-03 |
| MMP16                  |       |          |
| <i>drugtarget,me</i>   | 0.358 | 1.58e-03 |
| <i>mbrane</i>          |       |          |
| FZD7                   |       |          |
| <i>development,m</i>   |       |          |
| <i>embrane</i>         | 0.358 | 1.59e-03 |
| <i>,sign transd</i>    |       |          |
| KLHL42                 | 0.358 | 1.61e-03 |
| ACVR1                  |       |          |
| <i>apoptosis,cell</i>  |       |          |
| <i>cycle</i>           |       |          |
| <i>,development,</i>   |       |          |
| <i>diff</i>            | 0.358 | 1.63e-03 |
| <i>,drugtarget,kin</i> |       |          |
| <i>ase</i>             |       |          |
| <i>,membrane,sig</i>   |       |          |
| <i>n transd</i>        |       |          |
| TACC2                  | 0.356 | 1.73e-03 |
| TFRC                   |       |          |
| <i>membrane</i>        | 0.353 | 2.02e-03 |
| ZRANB1                 | 0.353 | 2.05e-03 |
| PCYT1B                 |       |          |
| <i>drugtarget</i>      | 0.350 | 2.26e-03 |
| CNTN1                  |       |          |
| <i>membrane,sig</i>    | 0.349 | 2.39e-03 |
| <i>n transd</i>        |       |          |
| RASAL2 <i>sign</i>     |       |          |
| <i>transd</i>          | 0.319 | 8.08e-03 |
| SHROOM4                | 0.349 | 2.40e-03 |
| FZD6                   |       |          |
| <i>development,m</i>   |       |          |
| <i>embrane</i>         | 0.347 | 2.59e-03 |

|                      |       |          |
|----------------------|-------|----------|
| <i>,sign transd</i>  |       |          |
| DSTYK                | 0.319 | 7.96e-03 |
| NHSL1                | 0.347 | 2.61e-03 |
| SBF2                 |       |          |
| <i>development,m</i> | 0.319 | 7.84e-03 |
| <i>embrane</i>       |       |          |
| RAET1L               | 0.345 | 2.91e-03 |
| <i>membrane</i>      |       |          |
| IGFBP2               | 0.344 | 2.92e-03 |
| DCUN1D1              | 0.342 | 3.20e-03 |
| DIP2B                | 0.341 | 3.35e-03 |
| PRICKLE2             |       |          |
| <i>membrane</i>      | 0.341 | 3.38e-03 |
| CTTNBP2              | 0.340 | 3.51e-03 |
| USP54                | 0.339 | 3.58e-03 |
| DIRAS1               |       |          |
| <i>membrane,sig</i>  | 0.320 | 7.70e-03 |
| <i>n transd</i>      |       |          |
| PLD1                 |       |          |
| <i>drugtarget,me</i> |       |          |
| <i>mbrane</i>        | 0.338 | 3.72e-03 |
| <i>,sign transd</i>  |       |          |
| ITGAV                |       |          |
| <i>membrane,sig</i>  | 0.338 | 3.75e-03 |
| <i>n transd</i>      |       |          |
| PCDH19               | 0.338 | 3.79e-03 |
| <i>membrane</i>      |       |          |
| SERTAD4-             |       |          |
| AS1                  | 0.336 | 4.03e-03 |
| ATP8B1               |       |          |
| <i>membrane</i>      | 0.336 | 4.04e-03 |
| CDS1                 |       |          |
| <i>membrane,sig</i>  | 0.336 | 4.12e-03 |
| <i>n transd</i>      |       |          |
| PTPRF                |       |          |
| <i>membrane,sig</i>  | 0.335 | 4.31e-03 |
| <i>n transd</i>      |       |          |
| KIAA1715             |       |          |
| <i>development,m</i> | 0.334 | 4.52e-03 |
| <i>embrane</i>       |       |          |
| ULBP3                | 0.332 | 4.76e-03 |
| <i>membrane</i>      |       |          |
| MTSS1L               | 0.321 | 7.28e-03 |
| ITGB5                |       |          |
| <i>development,m</i> |       |          |
| <i>embrane</i>       | 0.331 | 4.92e-03 |
| <i>,sign transd</i>  |       |          |

|                       |       |          |
|-----------------------|-------|----------|
| PRKG2                 |       |          |
| <i>kinase,sign</i>    | 0.331 | 4.92e-03 |
| <i>transd</i>         |       |          |
| PLEKHG1               |       |          |
| <i>sign transd</i>    | 0.331 | 4.92e-03 |
| TMEM47                |       |          |
| <i>membrane</i>       | 0.331 | 4.94e-03 |
| AKR1C2                |       |          |
| <i>drugtarget</i>     | 0.331 | 4.99e-03 |
| CTDSPL2               |       |          |
| SC5D                  | 0.330 | 5.11e-03 |
| MFSD11                | 0.322 | 7.12e-03 |
| ADGRA3                | 0.330 | 5.23e-03 |
| FREM2                 | 0.329 | 5.38e-03 |
| <i>development,m</i>  |       |          |
| <i>embrane</i>        | 0.328 | 5.64e-03 |
| APCDD1L               |       |          |
| <i>membrane</i>       | 0.328 | 5.67e-03 |
| XKRX                  |       |          |
| <i>membrane</i>       | 0.328 | 5.68e-03 |
| GNAL                  |       |          |
| <i>sign</i>           |       |          |
| <i>transd</i>         | 0.323 | 6.78e-03 |
| ATP2B4                |       |          |
| <i>membrane</i>       | 0.327 | 5.91e-03 |
| WNT5A                 |       |          |
| <i>development,si</i> |       |          |
| <i>gn transd</i>      | 0.323 | 6.76e-03 |
| PLEKHA5               |       |          |
| SMO                   | 0.327 | 5.99e-03 |
| <i>apoptosis,deve</i> |       |          |
| <i>lopment</i>        |       |          |
| <i>,diff,membran</i>  |       |          |
| <i>e</i>              | 0.324 | 6.60e-03 |
| <i>,sign transd</i>   |       |          |
| KIAA1549L             | 0.326 | 6.04e-03 |
| INPP5A                |       |          |
| <i>membrane</i>       | 0.326 | 6.22e-03 |
| ZAK                   |       |          |
| <i>apoptosis,cell</i> |       |          |
| <i>cycle</i>          | 0.326 | 6.24e-03 |
| <i>,diff,kinase</i>   |       |          |
| <i>,sign transd</i>   |       |          |
| LGR5                  |       |          |
| <i>membrane,sig</i>   |       |          |
| <i>n transd</i>       | 0.324 | 6.48e-03 |

| Set                                                                                    | R#  | No of genes | P-value | Genes                         |
|----------------------------------------------------------------------------------------|-----|-------------|---------|-------------------------------|
| <i>over-representation</i><br>Basal_cell_carcinoma                                     | 55  | 4           | 9.9e-10 | , FZD6,<br>FZD7,              |
| <i>over-representation</i><br>Wnt_signaling_pathway                                    | 140 | 6           | 1.0e-08 | , FZD6,<br>FZD7,              |
| <i>over-representation</i><br>Proteoglycans_in_cancer                                  | 200 | 6           | 6.6e-06 | , FZD6,<br>FZD7,              |
| <i>over-representation</i><br>Signaling_pathways_regulating_pluripotency_of_stem_cells | 141 | 4           | 9.1e-04 | ,<br>ACVR1,<br>FZD6,<br>FZD7, |
| <i>over-representation</i><br>Glycerophospholipid_metabolism                           | 94  | 3           | 3.3e-03 | , CDS1,<br>PCYT1B,            |
| <i>over-representation</i><br>Melanogenesis                                            | 100 | 3           | 5.0e-03 | , FZD6,<br>FZD7,              |
| <i>over-representation</i><br>Hedgehog_signaling_pathway                               | 50  | 2           | 0.01    | , SMO,<br>WNT5A               |
| <i>over-representation</i><br>Pathways_in_cancer                                       | 397 | 6           | 0.01    | , FZD6,<br>FZD7,              |
| <i>over-representation</i><br>Cell_adhesion_molecules__CAMs__                          | 139 | 3           | 0.03    | , CNTN1,<br>ITGAV,            |
| <i>over-representation</i><br>Phagosome                                                | 150 | 3           | 0.04    | , ITGAV,<br>ITGB5,            |
