# Supplementary material for: PD-L1 and PD-L2 Expression in Cervical Cancer: Regulation and Biomarker Potential
Source: PubMed Central journal article supplement (PMC7793653; doi:10.3389/fimmu.2020.596825), 2020-12-17
Supplement: DataSheet_2.pdf [file DataSheet_2.pdf]

| HUGO                 | R     | pval     | Pres |
|----------------------|-------|----------|------|
| RBM24                | 0.323 | 7.90e-03 | 116  |
| APCDD1L1             | 0.385 | 5.05e-04 | 116  |
| PPP6R3               | 0.375 | 7.99e-04 | 121  |
| SHANK1               | 0.374 | 8.52e-04 | 92   |
| CA12 drugtarget      | 0.367 | 1.20e-03 | 121  |
| CTTN                 | 0.362 | 1.51e-03 | 121  |
| CAMSAP2              | 0.357 | 1.84e-03 | 121  |
| KCND2 membrane       | 0.356 | 1.93e-03 | 121  |
| DHCR7 dev            |       |          |      |
| ,drugtarget          | 0.355 | 2.08e-03 | 121  |
| ,membrane            |       |          |      |
| SHISA2               | 0.352 | 2.38e-03 | 120  |
| ARAP3                | 0.319 | 9.17e-03 | 121  |
| ENDOD1               | 0.350 | 2.54e-03 | 121  |
| FOXL1 TF,coregulator |       |          |      |
| ,transcription       | 0.319 | 9.06e-03 | 121  |
| regulator            |       |          |      |
| Act                  |       |          |      |
| SRPX2                | 0.346 | 3.00e-03 | 121  |
| SUN1                 | 0.320 | 8.92e-03 | 121  |
| TOM1L1 membrane      | 0.320 | 8.91e-03 | 121  |
| LRP4 membrane        | 0.346 | 3.02e-03 | 121  |
| PTHLH dev,sign       |       |          |      |
| ,sign                | 0.344 | 3.37e-03 | 121  |
| transd               |       |          |      |
| FRK kinase,          | 0.341 | 3.74e-03 | 121  |
| GALNT5 membrane      | 0.336 | 4.52e-03 | 115  |

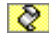

|                                          |       |          |     |
|------------------------------------------|-------|----------|-----|
| SYT7 memt                                | 0.335 | 4.76e-03 | 121 |
| ADAMTS12                                 | 0.332 | 5.36e-03 | 120 |
| MMP16 dru,<br>ZAK apopto<br>,diff,kinase | 0.331 | 5.68e-03 | 116 |
| ,sign<br>transd                          | 0.329 | 6.05e-03 | 121 |
| PCDH10 mc                                | 0.322 | 8.19e-03 | 96  |
| NPBWR1 m                                 | 0.328 | 6.30e-03 | 93  |
| TACC2                                    | 0.322 | 8.07e-03 | 121 |
| MAP3K4 ki                                | 0.326 | 7.07e-03 | 121 |
| MSRB3                                    | 0.323 | 7.98e-03 | 121 |

| set                              | R# | #   | _p_value_ | Genelist    |
|----------------------------------|----|-----|-----------|-------------|
| <i>over-representation</i>       |    | 17  | 1 4.8e-03 | , CA12      |
| Nitrogen_metabolism              |    |     |           |             |
| <i>over-representation</i>       |    | 137 | 2 6.8e-03 | , CTTN, ZAK |
| Tight_junction                   |    |     |           |             |
| <i>over-representation</i>       |    | 20  | 1 0.01    | , DHCR7     |
| Steroid_biosynthesis             |    |     |           |             |
| <i>over-representation</i>       |    | 30  | 1 0.04    | , GALNT5    |
| Mucin_type_O_Glycan_biosynthesis |    |     |           |             |
